# Supplementary material
Source: publisher figshare collection journal article supplement (https://acs.figshare.com/ndownloader/files/4265893)
Supplement: Supplementary file 1 [file 4265893]

**Supporting Information for:**

**The distinguished roles with various vanadium loadings of  $\text{CoCr}_{2-x}\text{V}_x\text{O}_4$   
( $x = 0-0.20$ ) for methane combustion**

Jinghuan Chen <sup>†</sup>, Wenbo Shi <sup>†</sup>, Shijian Yang <sup>†</sup>, Hamidreza Arandiyani <sup>†</sup>, Junhua Li <sup>\*,†,‡</sup>

<sup>†</sup> *School of Environment, Tsinghua University, Beijing, 100084, China*

<sup>‡</sup> *State Key Joint Laboratory of Environment Simulation and Pollution Control (SKLESPC),  
Beijing, 100084, China*

\* Corresponding author e-mail: [lijunhua@tsinghua.edu.cn](mailto:lijunhua@tsinghua.edu.cn)

**Number of Supporting Information pages (including this title page): 6**

**Results and discussion about figures in the Supporting Information (p. S2)**

**List of Figures (p. S3-S6):**

**Figure S1:** Methane conversion as a function of temperature over the  $\text{CoCr}_{2-x}\text{V}_x\text{O}_4$  ( $x = 0, 0.05$  and **0.25**) catalysts.

**Figure S2:** TEM images of the  $\text{CoCr}_{1.80}\text{V}_{0.20}\text{O}_4$  catalyst.

**Figure S3:** XRD patterns of the  $\text{Co}_3\text{O}_4$ ,  $\text{CrO}_x$  and  $\text{VO}_x$  catalysts.

**Figure S4:**  $\text{CH}_4$  conversion (A) and  $\text{CH}_4$  specific reaction rate (B) as a function of the temperature over the  $\text{Co}_3\text{O}_4$ ,  $\text{CrO}_x$  and  $\text{VO}_x$  catalysts.

## Results and discussion about figures in the Supporting Information

The  $\text{CoCr}_{1.75}\text{V}_{0.25}\text{O}_4$  catalyst was prepared and investigated for methane combustion. Figure S1 shows the catalytic activity of the  $\text{CoCr}_{1.75}\text{V}_{0.25}\text{O}_4$  catalyst as a function of the reaction temperature. For comparison purpose, the activity of the  $\text{CoCr}_2\text{O}_4$  and  $\text{CoCr}_{1.95}\text{V}_{0.05}\text{O}_4$  was also given. It can be observed that further vanadium doping significantly decreased the activity, the methane conversion at 700 °C over  $\text{CoCr}_{1.75}\text{V}_{0.25}\text{O}_4$  was as low as 21%.

Transmission electron microscopy (TEM) was collected on a JEOL JEM 2010 microscope operating at 200 kV equipped with an energy dispersive X-ray (EDX) system. As shown in Figure S2, vanadium oxides cannot be observed even on well dispersed particles of the  $\text{CoCr}_{1.80}\text{V}_{0.20}\text{O}_4$  sample.

For better comparison, pure oxides of cobalt, chromium and vanadium were prepared using the similar procedures with the  $\text{CoCr}_{2-x}\text{V}_x\text{O}_4$  catalysts, and their catalytic performance, BET surface areas and XRD patterns were also investigated. As shown in Figure S3, the  $\text{VO}_x$  was combined phases of  $\text{V}_2\text{O}_5$  (JCPDS 41-1426),  $\text{VO}_2$  (PDF 43-1051) and  $\text{V}_6\text{O}_{13}$  (PDF 43-1050), while chromium and cobalt oxides were pure phase as expected according to  $\text{Cr}_2\text{O}_3$  (JCPDS 6-0504) and  $\text{Co}_3\text{O}_4$  (JCPDS 42-1467), respectively. The specific surface area was 9.5, 116.9 and 1.5  $\text{m}^2/\text{g}$  for  $\text{VO}_x$ ,  $\text{CrO}_x$  and  $\text{Co}_3\text{O}_4$ , respectively. Figure S4 shows the activity of the three oxides. Apparently, methane conversion over  $\text{CrO}_x$  was better than  $\text{Co}_3\text{O}_4$ , however, if we take the surface area into account, the specific reaction rate of  $\text{Co}_3\text{O}_4$  was much higher than that of the  $\text{CrO}_x$  catalyst. In addition,  $\text{VO}_x$  showed nearly no activity towards methane combustion.

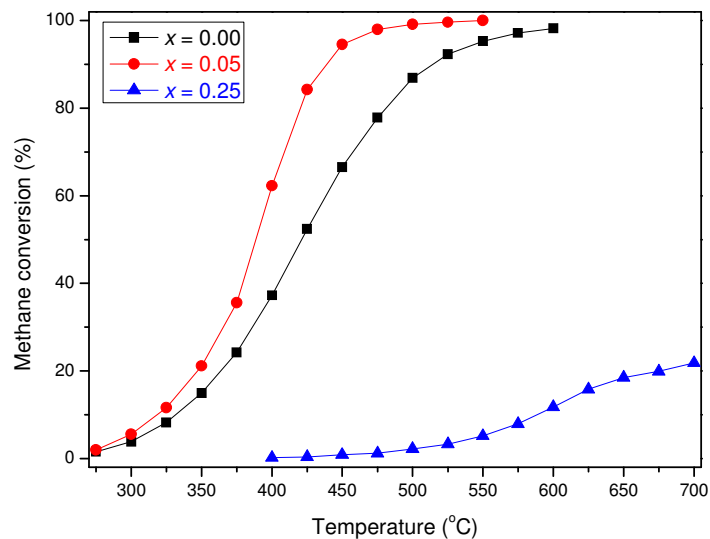

**Figure S1.** Methane conversion as a function of temperature over the  $\text{CoCr}_{2-x}\text{V}_x\text{O}_4$  ( $x = 0$ , 0.05 and **0.25**) catalysts. Reaction condition: 2000 ppm  $\text{CH}_4$ , 10 vol. %  $\text{O}_2$ , and  $\text{N}_2$  as the balance gas, with a total flow rate of 150 mL/min, corresponding to a GHSV about 36,000  $\text{mL}\cdot\text{h}^{-1}\cdot\text{g}^{-1}$ .

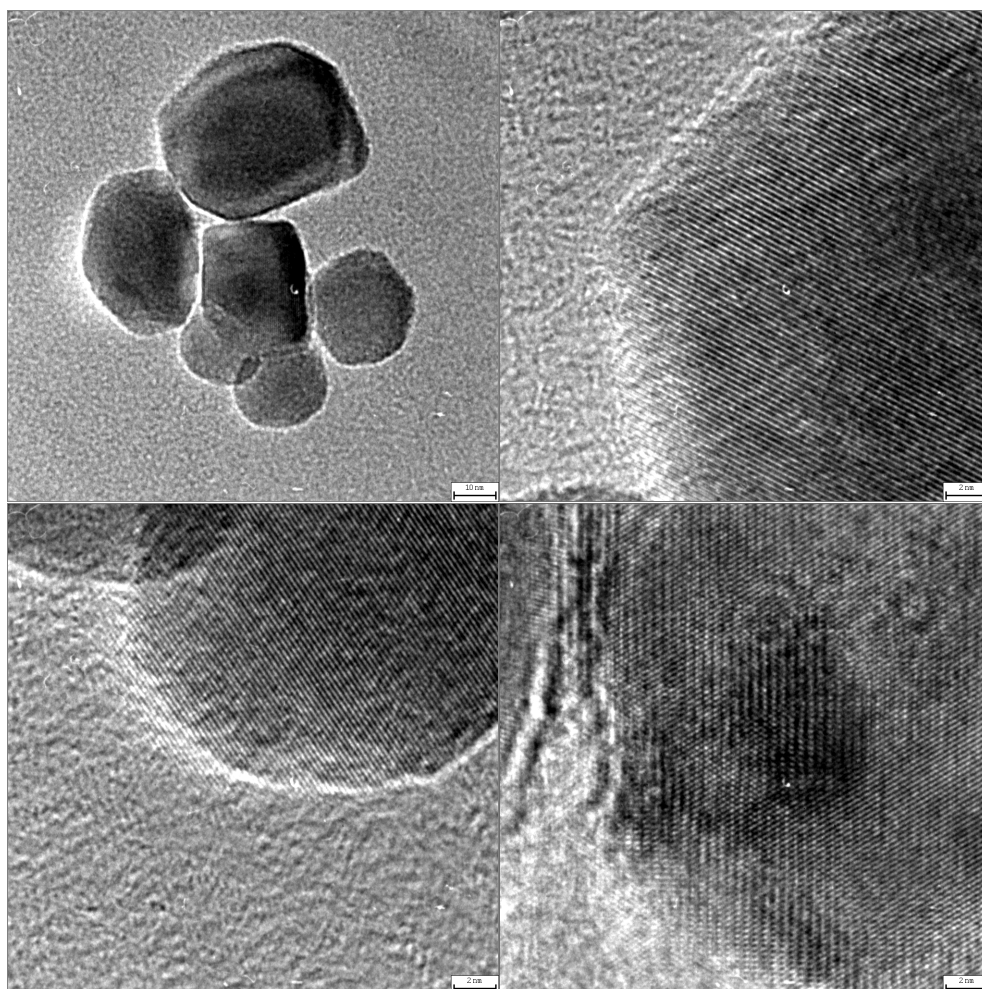

**Figure S2.** TEM images of the CoCr<sub>1.80</sub>V<sub>0.20</sub>O<sub>4</sub> catalyst.

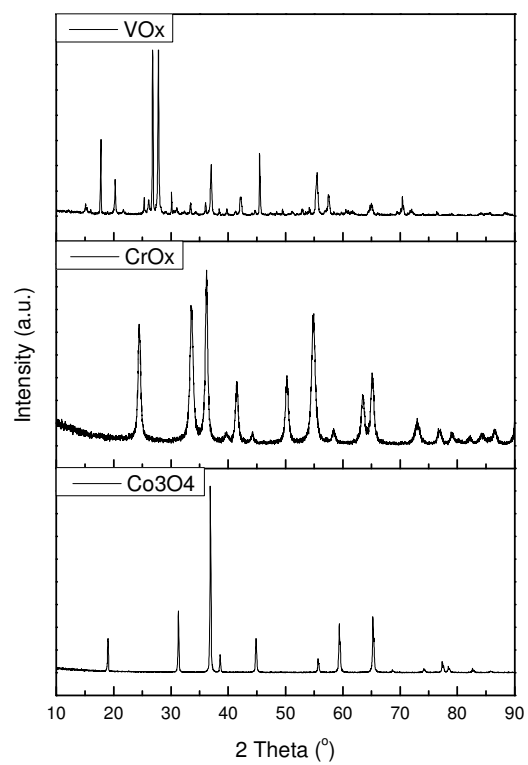

**Figure S3.** XRD patterns of the Co<sub>3</sub>O<sub>4</sub>, CrO<sub>x</sub> and VO<sub>x</sub> catalysts.

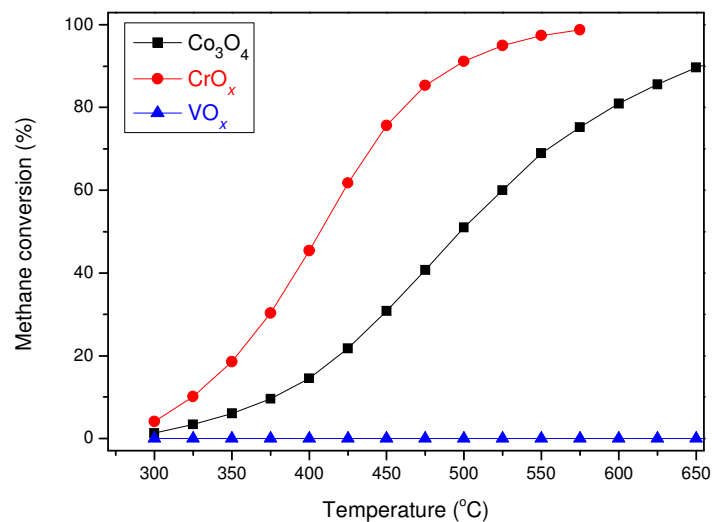

(A)

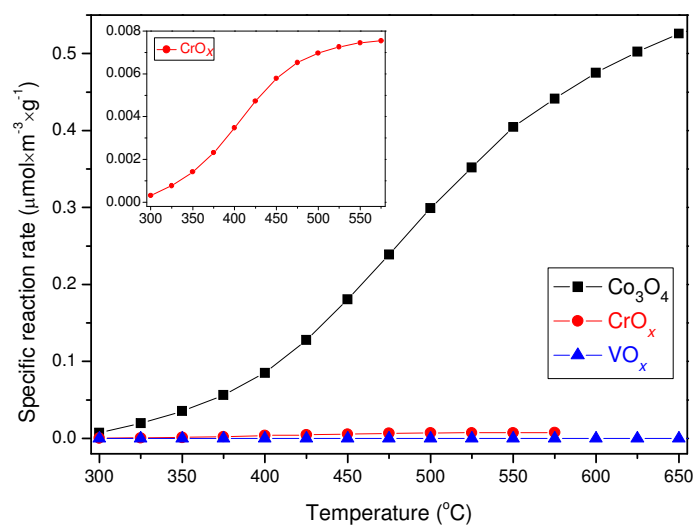

(B)

**Figure S4.** CH<sub>4</sub> conversion (A) and CH<sub>4</sub> specific reaction rate (B) as a function of temperature over the Co<sub>3</sub>O<sub>4</sub>, CrO<sub>x</sub> and VO<sub>x</sub> catalysts. Reaction condition: 2000 ppm CH<sub>4</sub>, 10 vol. % O<sub>2</sub>, and N<sub>2</sub> as the balance gas, with a total flow rate of 150 mL/min, corresponding to a GHSV about 36,000 mL·h<sup>-1</sup>·g<sup>-1</sup>.
